# Supplementary material for: Xbp1 and Brachyury establish an evolutionarily conserved subcircuit of the notochord gene regulatory network
Source: eLife journal article supplement (doi:10.7554/elife.73992), 2022-01-20
Supplement: supp [file elife-73992-supp-v1.zip]

Archive with 14 entries (14 files):
- elife_poa_e73992_Figure_2_figure_supplement_1.jpg
- elife_poa_e73992_Figure_3_figure_supplement_1.jpg
- elife_poa_e73992_Figure_3_figure_supplement_2.jpg
- elife_poa_e73992_Figure_3_figure_supplement_3.jpg
- elife_poa_e73992_Figure_5_figure_supplement_1.jpg
- elife_poa_e73992_Figure_6_figure_supplement_1.jpg
- elife_poa_e73992_Supplementary_file_1.xlsx
- elife_poa_e73992_Supplementary_file_2.xlsx
- elife_poa_e73992_Supplementary_file_3.xlsx
- elife_poa_e73992_Video_1.avi
- elife_poa_e73992_Video_2.mov
- elife_poa_e73992_Figure_5_figure_supplement_1_source_data_1.pdf
- elife_poa_e73992_Figure_5_figure_supplement_1_source_data_2.pdf
- elife_poa_e73992_Transparent_Reporting_File.pdf
