# Supplementary material for: Xbp1 and Brachyury establish an evolutionarily conserved subcircuit of the notochord gene regulatory network
Source: eLife journal article supplement (doi:10.7554/elife.73992), 2022-01-20
Supplement: supp [file elife-73992-supp-v1.zip › elife_poa_e73992_Supplementary_file_1.xlsx]

## Sheet: Sheet1
Table S1. Ciona Xbp1 putative target genes expressed in the notochord.
KH gene model	Alternative/former Gene Name(s)	Latest Gene Name	Expression	References	Figure	Gene Ontology	Classified in Fig. 3 as:	Additional Notochord regulators	p-value	FC Absolute	Regulation in transgenic embryos	Transgene
KH.S1404.1	Ci-Brachyury	TBX19; TBX6; TBXT	Notochord	Corbo et al., 1997	Fig. 3A	transcription factor	DNA/RNA BINDING	Bra*	0.00414292	4.82897	down	Xbp1DBD/WT
KH.C9.485	Lmx-like	LHX5; LMX1A; LMX1B	Notochord and sensory vesicle	Jose'-Edwards et al., 2011	Fig. 3B	transcription factor	DNA/RNA BINDING	Bra*	0.043831	2.01962	down	Xbp1::VP16/WT
KH.C8.719	PTBP1/2/3	PTBP1; PTBP2; PTBP3	Transient notochord, epidermis	This Study, 21a15	Fig. 3C	RNA binding	DNA/RNA BINDING	Bra*, Foxa.a*	0.0278807	2.53163	down	Xbp1::VP16/WT
KH.C2.33	ZF105	ZNF385A; ZNF385B; ZNF385D	Notochord	Miwata et al., 2006	N/A	nucleic acid binding, zinc ion binding	DNA/RNA BINDING	Bra*, Foxa.a*	0.0195832	2.26251	down	Xbp1::VP16/WT
KH.L17.15	COUP	NR2F1; NR2F2; NR2F6	Ubiquitous	Ishibashi et al., 2003	N/A	transcription factor	DNA/RNA BINDING	Bra*, Foxa.a*	0.00599364	6.53727	up	Xbp1::VP16/WT
KH.S1497.1	RTL1	NYNRIN; RTL1	Transient notochord and mesenchyme	This Study, 85j03	Fig. S2A	Enzyme: retrotransposase	DNA/RNA BINDING		0.0144653	2.55278	up	Xbp1DBD/WT
KH.L154.7	HIS1:CG33807	H1F0; H1FX; HIST1H1C	Weak and transient notochord, mesenchyme	This Study, 35k24	Fig. S2C	histone	DNA/RNA BINDING		0.026888	2.47938	up	Xbp1DBD/WT
KH.C11.596		SLC13A2; SLC13A3; SLC13A5	Notochord and endoderm	This Study, 15c21	Fig. 3D	transporter activity	TRANSP/CH	Foxa.a*	0.0149516	4.12088	up	Xbp1::VP16/WT
KH.L37.39	VBA2/3/5	SLC18A2; SLC18A3; SLC18B1	Notochord, head endoderm, mesenchyme	Christiaen et al., 2008	N/A	transmembrane transporter	TRANSP/CH	Bra*	0.0149176	2.05765	down	Xbp1::VP16/WT
KH.C12.115	S23A1; S23A2; S23A3	SLC23A1; SLC23A2; SLC23A3	Posterior notochord	This Study, PCR product; also in Harder et al., 2019	Fig. 3E	transmembrane transporter	TRANSP/CH	Bra*, Foxa.a*	0.0378733	2.18739	down	Xbp1::VP16/WT
KH.C7.65	Ci-SLC (sulfate transporter)	SLC26A2; SLC26A4; SLC26A5	Notochord and otolith	Hotta et al., 1999; Kusakabe et al., 2002; Deng et al., 2013	N/A	transmembrane transporter (sulfate)	TRANSP/CH	Bra#	0.00634911	2.80316	down	Xbp1::VP16/WT
KH.C8.466	Slc43a3	SLC43A1; SLC43A2; SLC43A3	Notochord	This Study, 22m13	Fig. 3F	transmembrane transporter	TRANSP/CH	Bra#	0.0015374	2.38251	down	Xbp1::VP16/WT
KH.C8.582	KCNMB2/3	KCNMB3	Notochord, head endoderm	Satou et al., 2001	N/A	potassium channel	TRANSP/CH	Bra*, Foxa.a*	0.00590734	2.68154	down	Xbp1::VP16/WT
KH.C6.141	COL6A6	C1QTNF9B	Notochord, mesenchyme, trunk endoderm, endodermal strand	This Study, 04i07	Fig. 3G	secreted protein	ECM	Foxa.a*	0.0423715	3.64557	up	Xbp1::VP16/WT
KH.C7.484	Ci Hemicentin-like protein	HMCN1; HMCN2; TTN	Notochord and trunk endoderm	This Study, 45a22; notochord expression also reported in Brozovic et al., 2017	Fig. 3H	calcium ion binding	ECM	Bra*, Foxa.a*	0.040069	2.07598	down	Xbp1::VP16/WT
KH.C3.21	Ci-perlecan	HMCN1; HSPG2; LAMA2	Notochord	Takahashi et al., 1999	N/A	ECM	ECM	Bra§, Foxa.a*	0.0440986	2.09114	down	Xbp1::VP16/WT
KH.C1.1220	Selectin P	COL12A1; COL20A1; SELP	Notochord	This Study, 32d10	Fig. 3I	ECM	ECM	Bra*, Foxa.a*	0.0428278	2.1838	down	Xbp1::VP16/WT
KH.C3.225	fibrillin	FBN1; FBN2; FBN3	Notochord, epidermis	Satou et al., 2001	Fig. 4G	ECM	ECM	Foxa.a*	0.034043	2.37437	down	Xbp1::VP16/WT
KH.C2.1123	Thsd1	ADAMTS3; SEMA5A; UNC5C	Notochord	Jose'-Edwards et al., 2013	N/A	ECM, metallopeptidase	ECM	Bra*, Foxa.a*, Tbx2/3**	0.0114868	4.08644	up	Xbp1::VP16/WT
KH.C1.832	Ci-fibrinogen-like	FGL1; FGL2; FIBCD1	Notochord	Hotta et al., 2000; Yamada et al., 2009	N/A	ECM	ECM	Bra*	0.0391801	4.79505	down	Xbp1::VP16/WT
KH.C10.317	Fibronectin1 (FN1)-containing	FN1	Notochord	Jose'-Edwards et al., 2013	N/A	ECM	ECM	Bra*, Tbx2/3**	0.0194467	2.95486	down	Xbp1::VP16/WT
KH.C2.872	Goti-1	GNAI1; GNAI2; GNAI3	Notochord and bipolar tail neurons	This Study, 61a23 and Kim et al., 2020; notochord expression also reported by Brozovic et al., 2015.	Fig. 3J	signal transduction, G-protein	SIGN		0.00813941	2.102	down	Xbp1::VP16/WT
KH.L1.1	TRAF3/5	TRAF2; TRAF3; TRAF5	Weak notochord, mesenchyme, trunk epidermis	This Study, 69h07	Fig. 3K	signal transduction	SIGN		0.00277039	2.42204	up	Xbp1DBD/WT
KH.C8.378	RXFP1/2	RXFP1; RXFP2; TSHR	Notochord, trunk endoderm, mesenchyme	This Study, PCR product	Fig. 3L	Signal transduction, G-protein coupled receptor	SIGN		0.00256832	2.3162	up	Xbp1DBD/WT
KH.L131.17	CUZD1	CUZD1; TECTA; UMOD	Weak notochord, mesenchyme, trunk endoderm, epidermis	This Study, 26m02	Fig. 3M	plasma membrane	SIGN		0.0284217	2.30845	up	Xbp1::VP16/WT
KH.C11.674		CUZD1; OIT3; ZP2	Semi-ubiquitous staining, stronger in notochord, mesenchyme and CNS	This Study, 03o21	Fig. S2B	plasma membrane	SIGN	Foxa.a*	0.000290239	8.43557	up	Xbp1::VP16/WT
KH.C3.724	TGF-beta2/3	TGFB1; TGFB2; TGFB3	Notochord	Imai et al., 2004	N/A	secreted ligand	SIGN	Bra*, Foxa.a*	0.0329376	2.62816	down	Xbp1DBD/WT
KH.C7.500		OLFM2; OLFML2A; OLFML2B	Notochord	Jose'-Edwards et al., 2015 (Ci-CRM112)	N/A	nucleoplasm	SIGN	Foxa.a (Jose'-Edwards et al., 2015)	0.0405732	2.58869	down	Xbp1::VP16/WT
KH.L18.30	Noto4	PID1	Notochord	Hotta et al., 2000; Yamada et al., 2011	N/A	cytoplasm	SIGN	Bra*, Tbx2/3**	0.0230434	5.20425	down	Xbp1::VP16/WT
KH.C3.411	Lefty/Antivin/TGFbeta superfamily signaling ligand	BMP4; LEFTY1; LEFTY2	Notochord precursors (transient), tail epidermis, posterior secondary muscle lineage	Imai et al., 2004; Hudson and Yasuo, 2005	N/A	growth factor activity	SIGN		0.0227644	2.47455	up	Xbp1::VP16/WT
KH.L99.8	TSPEAR precursor	LGI2; LGI3; TSPEAR	Notochord	This Study, 27g16 and Brozovic et al., 2015, 2017	N/A	cell surface	SIGN	Bra*	0.0260956	2.68281	down	Xbp1DBD/WT
KH.C11.665	Noto8	CALML3; CETN2; CETN3	Notochord	Hotta et al., 2000	N/A	calcium ion binding	SIGN	Bra*, Foxa.a*	0.0013214	4.65623	down	Xbp1DBD/WT
KH.C9.753		PPIA; PPIB; PPIC	Weak staining in the notochord; stronger staining in posterior notochord and mesenchyme	This Study, 07k06	Fig. S2E	Enzyme: peptidyl-prolyl cis-trans isomerase	PROTEIN FOLDING	Bra#	0.00104341	13.8802	up	Xbp1::VP16/WT
KH.C5.16		A2M; CD109; PZP	Notochord, anterior-most and posterior-most cells	This Study, 88P12	Fig. 3N	Endopeptidase inhibitor	PROTEOLYSIS	Bra*	0.0125566	2.16143	up	Xbp1::VP16/WT
KH.C12.7	Dcp-1	CASP3; CASP6; CASP7	Notochord, trunk endoderm, mesenchyme	This Study, 46b02	Fig. 3O	Enzyme: endopeptidase	PROTEOLYSIS	Foxa.a*	0.0166801	2.47123	down	Xbp1::VP16/WT
KH.S2308.1		F11; LPA; PLG	Semi-ubiquitous, stronger in notochord and possibly mesenchyme	This Study, 64P02	Fig. S2G	Enzyme: serine-type endopeptidase activity	PROTEOLYSIS	Bra*	0.00115646	2.34799	up	Xbp1DBD/WT
KH.S663.4	TAT-4/TEX264	TEX264	Notochord, trunk endoderm, mesenchyme	This Study, 17b03	Fig. 3P	ER membrane, autophagy receptor	AUTOPHAGY		0.0439618	2.33925	up	Xbp1DBD/WT
KH.S534.2	RB1CC1	RB1CC1	Notochord, head endoderm, nervous system, epidermis	Satou et al., 2001	N/A	autophagy	AUTOPHAGY		0.0055633	2.47857	up	Xbp1::VP16/WT
KH.L87.39	BOK	BAX; BCL2; BOK	Weak notochord at early and mid-tailbud; distinct staining in sensory vesicle and a small part of the mesenchyme; diffuse staining in the tail	This Study, 18f19	Fig. S2D	autophagy	AUTOPHAGY		0.0237095	2.86388	up	Xbp1::VP16/WT
KH.C8.791	RNF220	DTX3L; PCGF2; RNF220	Notochord, epidermis, mesenchyme and a very small region of the posterior sensory vesicle	This Study, 43c24	Fig. 3R	Enzyme: ubiquitin-protein ligase	UBIQ	Bra*	0.00774785	2.07027	down	Xbp1::VP16/WT
KH.C7.664		MIB1; MIB2	Diffuse semi-ubiquitous staining, stronger in notochord, mesenchyme and trunk endoderm.	This Study, 06j15	Fig. 3S	Enzyme: ubiquitin-protein ligase	UBIQ		0.00616558	2.2248	down	Xbp1DBD/WT
KH.C6.205		LONRF2; PEX10; RNF13	Ubiquitous, stronger in the CNS and mesenchyme	This Study, 38i24	Fig. S2F	Putative E3 ubiquitin-protein ligase	UBIQ		0.00388815	3.86894	up	Xbp1::VP16/WT
KH.S681.3	CLEC-54/55/56/57	CDCP2; CUBN; TLL2	Transient notochord, mesenchyme, sensory vesicle	This Study, 02o05	Fig. 3T	extracellular region	CELL SURF./COMMUN.		0.0251478	2.88985	up	Xbp1::VP16/WT
KH.S461.5	GJA10/9	GJA10; GJA8; GJC1	Notochord, trunk endoderm, mesenchyme	This Study, 02p10	Fig. 3U	gap junction	CELL SURF./COMMUN.	Bra*, Foxa.a*	0.00178317	2.42924	up	Xbp1DBD/WT
KH.L146.6		DNAJC7; TOMM34; TTC1	Diffuse semi-ubiquitous staining, stronger in mesenchyme but also visible in notochord.	This Study, 104C09	Fig. 3V	co-chaperone	TRAFFICKING		0.0167296	2.057	up	Xbp1::VP16/WT
KH.C14.39		VPS35L	Diffuse staining, stronger in notochord and trunk endoderm	This Study, 24i06, 80i18	Fig. 3W	Endosomal protein, intracellular trafficking	TRAFFICKING		0.0198269	2.14686	down	Xbp1::VP16/WT
KH.L99.2		CLVS1; RLBP1; TTPAL	Notochord and trunk endoderm	This Study, PCR product	Fig. 3X	transporter activity (vesicle-mediated transport)	TRAFFICKING	Bra#	0.00092035	8.88653	up	Xbp1::VP16/WT
KH.C2.58	NEK1	NEK1; NEK3; NEK5	Notochord and endoderm	This Study, 45h10	Fig. 3Q	Enzyme: protein kinase	CELL CYCLE	Foxa.a*	0.0404914	2.60309	up	Xbp1::VP16/WT
KH.C12.74		EPX; MPO; PXDN	Muscle, weak and transient notochord staining at neurula	This Study, 29p19	Fig. S2I	Enzyme: peroxidase	REDOX	Bra*	0.00546919	3.3349	up	Xbp1::VP16/WT
KH.C2.792	C6ST-like 1	CHST1; CHST3; CHST4	Notochord	Tetsukawa et al., 2010	N/A	Enzyme: sulfotransferase, intrinsic component of Golgi membrane	PROTEIN SYNTH/MODIF		0.0312576	2.18529	up	Xbp1DBD/WT
KH.C7.298	R05H10.1/7	KH.C7.298	Diffuse signal, stronger in mesenchyme and sensory vesicle, weak in notochord	This Study, EST 10p24; Fujiwara et al., 2002	Fig. S2J	Enzyme: Acyl-CoA N-acyltransferase	PROTEIN SYNTH/MODIF		0.00186563	2.38315	down	Xbp1DBD/WT
KH.C13.68		AKR1B10; AKR1B15; GCLM	Transient notochord, mesenchyme, epidermis in larvae	Satou et al., 2001	N/A	Enzyme: aldo-keto reductase	GEN. METABOLISM		0.000414777	7.41201	down	Xbp1::VP16/WT
KH.S749.1		GFAP; INA; VIM	Notochord, trunk endoderm, mesenchyme	This Study, 69g14	Fig. S2H	structural constituent of cytoskeleton	CYTOSK	Foxa.a*	0.0122272	2.54591	up	Xbp1::VP16/WT
KH.C8.811		KH.C8.811	Diffuse staining at early stages, transient notochord staining in mid/late tailbuds. Also expressed in the neurohypophysis primordium/anterior neural boundary	This Study, 44d08	Fig. S3A,A'	N/A	N/A	Bra#	0.00126873	5.09878	up	Xbp1::VP16/WT
KH.C7.708		KH.C7.708	Notochord and endoderm	This Study, 15g12	Fig. S3B	N/A	N/A		0.0422317	2.31716	up	Xbp1::VP16/WT
KH.S1555.1		KH.S1555.1	Transient faint notochord, mesenchyme	This Study, 39f11	Fig. S3C	N/A	N/A		0.037601	2.60015	up	Xbp1::VP16/WT
KH.L40.17		KH.L40.17	Notochord, discontinuous staining	This Study, 12m24	Fig. S3D	N/A	N/A		0.0360675	2.24414	down	Xbp1DBD/WT
KH.L172.11	ROST	KH.L172.11	Notochord, mesenchyme, occasional staining in a few regions of the tail epidermis	This Study, 38m04	Fig. S3E	N/A	N/A	Bra#	0.0328686	2.3712	up	Xbp1::VP16/WT
KH.C13.18	KRTAP10-1/10/11/12/2/3/5/8/9	KH.C13.18	Notochord, mesenchyme, weak tail and trunk epidermis	This Study, 04j20	Fig. S3F	N/A	N/A		0.0318778	2.11925	up	Xbp1::VP16/WT
KH.S215.2		KH.S215.2	Notochord, trunk endoderm, mesenchyme	This Study, 25e14	Fig. S3G	N/A	N/A		0.003264	4.21292	up	Xbp1::VP16/WT
KH.L87.23		KH.L87.23	Notochord, trunk endoderm, mesenchyme	This Study, 03o03	Fig. S3H	N/A	N/A	Bra*	0.0403575	2.15002	up	Xbp1::VP16/WT
KH.L133.3		KH.L133.3	Notochord, trunk endoderm, mesenchyme, sensory vesicle	This Study, 46l01	Fig. S3I	N/A	N/A		0.0406637	2.74583	up	Xbp1::VP16/WT
KH.C2.235		KH.C2.235	Diffuse ubiquitous staining, including notochord	This Study, 72a09	Fig. S3J	N/A	N/A		0.00933596	2.7623	up	Xbp1::VP16/WT
KH.C1.3		KH.C1.3	Notochord, possibly trunk endoderm and mesenchyme	This Study, PCR product	Fig. S3K	N/A	N/A	Bra*	0.000794491	5.1433	up	Xbp1::VP16/WT
KH.C4.23	Ci-pannexin1	KH.C4.23	Transient notochord, mesenchyme, trunk endoderm	This Study, 84a21	Fig. S3L	N/A	N/A	Bra*, Foxa.a*	0.045104	2.32069	up	Xbp1DBD/WT
KH.C3.662		KH.C3.662	Notochord (perinuclear staining), mesenchyme	This Study, 26d03	Fig. S3M	N/A	N/A		0.00218512	2.31555	up	Xbp1::VP16/WT
KH.C6.9		KH.C6.9	Transient notochord at early tailbud, mesenchyme, trunk endoderm	This Study, 04g16	Fig. S3N	N/A	N/A		0.00139741	6.17885	up	Xbp1::VP16/WT
KH.C12.228	S1PR4	KH.C12.228	Diffuse staining in the tail, including notochord; stronger staining in the trunk	This Study, 76K18	Fig. S3O	N/A	N/A	Bra*, Foxa.a*	0.0326236	2.11306	up	Xbp1::VP16/WT
KH.C12.600		KH.C12.600	Notochord	Jose'-Edwards et al., 2013	N/A	N/A	N/A	Bra*, Foxa.a*, Tbx2/3**	0.0104638	4.69797	down	Xbp1::VP16/WT
KH.C8.749		KH.C8.749	Notochord	Jose'-Edwards et al., 2013	N/A	N/A	N/A	Bra#, Foxa.a*, Tbx2/3**	0.0429745	3.74931	down	Xbp1::VP16/WT
KH.S852.3		KH.S852.3	Notochord, muscle (larvae only)	Kusakabe et al., 2002	N/A	N/A	N/A	Bra*, Foxa.a*	0.0127328	3.40273	up	Xbp1::VP16/WT
§ Hotta et al., 2008
* Kubo et al., 2010
** Jose'-Edwards et al., 2013
# Reeves et al., 2017
Abbreviations:
FC, fold-change
TRANSP/CH, transporter, channel or pump
ECM, extracellular matrix
SIGN, signaling pathway component
UBIQ, ubiquitin pathway
CELL SURF./COMMUN., cell surface and/or cell communication
PROTEIN SYNTH/MODIF, protein synthesis or modification
REDOX, reduction-oxidation
CYTOSK, cytoskeleton
GEN. METABOLISM, general metabolism
N/A, not available/applicable
