# Supplementary material for: Xbp1 and Brachyury establish an evolutionarily conserved subcircuit of the notochord gene regulatory network
Source: eLife journal article supplement (doi:10.7554/elife.73992), 2022-01-20
Supplement: supp [file elife-73992-supp-v1.zip › elife_poa_e73992_Supplementary_file_2.xlsx]

## Sheet: Sheet1
Table 2. Ciona Xbp1 putative target genes expressed in tissues other than the notochord.
KH gene model	Alternative/former Gene Name(s)	Latest Gene Name	Expression	References	Figure	Expression in juveniles	Gene Ontology	Additional regulators	p-value	FC Absolute	Regulation in transgenic embryos	Transgene
KH.L132.6		CPA1; CPA2; CPA5	Endoderm; a very faint transient staining might be present in the notochord at neurula	This Study, PCR product	Fig. S4A		Enzyme: metallocarboxypeptidase activity, zinc ion binding	Bra*	0.00243561	16.9851	up	Xbp1::VP16/WT
KH.C12.465		MRPS24	No localized signal	This Study, 12f12	N/A		mitochondrial ribosomal protein		0.00630664	6.27621	down	Xbp1DBD/WT
KH.S779.7	TECTA	TECTA; ZP2; ZPLD1	Diffuse weak staining, slightly stronger in mesenchyme.	This Study, EST 59G24	data not shown		Protein kinase, EGFR binding		0.00621719	4.73879	up	Xbp1::VP16/WT
KH.L130.6		HEY1; HEY2; HEYL	No distinct zygotic signal	Imai et al., 2004	N/A		transcription factor		0.00736647	3.87217	up	Xbp1::VP16/WT
KH.L96.95		ERN2	Mesenchyme	Jose'-Edwards et al., 2013	N/A		Serine/Threonine-Protein Kinase/Endoribonuclease	Tbx2/3**	0.0255144	3.76326	up	Xbp1DBD/WT
KH.C11.648	PAI1; SPB13; SPB9	SERPINB3; SERPINB9; SERPINE1	Expressed in a few cells, possibly neurons, in nerve cord	This Study, EST 64i21	Fig. S4B	Branchial pharynx, endostyle (Ogasawara et al., 2002)	protease binding		0.0029752	3.52208	up	Xbp1::VP16/WT
KH.C12.323		AQP2; AQP4; AQP8	Mesenchyme, head epidermis, head endoderm, neural plate, anterior and posterior sensory vesicle	Hamada et al., 2007	N/A		transporter activity		0.0072154	3.31522	up	Xbp1::VP16/WT
KH.S1240.1		KH.S1240.1	Mesenchyme, possibly trunk endoderm	This Study, EST 40f18	Fig. S4C		Harbinger transposase-derived nuclease domain		0.0398788	3.2495	down	Xbp1DBD/WT
KH.C7.781		FGD1; FGD2; FGD4	Mesenchyme	This Study, EST 05c18	Fig. S4D		actin binding, ruffle formation	Foxa.a*	0.0189193	3.02467	up	Xbp1::VP16/WT
KH.L170.64		KH.L170.64	Sensory vesicle	Razy-Krajka et al., 2018	N/A		N/A		0.0424145	2.73633	up	Xbp1::VP16/WT
KH.L153.79	Ci-Pitx	PITX1; PITX2; PITX3	Neurohypophysis (anterior neural boundary), part of epidermis, pharynx, posterior and anterior sensory vesicle	Christiaen et al., 2002	N/A	Oral siphon primordium (stomodeum)(Christiaen et al., 2005)	transcription factor	Foxa.a*	0.00438224	2.58922	up	Xbp1::VP16/WT
KH.L20.60		DDC; GAD2; HDC	Ventral sensory vesicle	Shimozono et al., 2010	N/A		catalytic activity	Foxa.a*	0.0281819	2.50749	up	Xbp1::VP16/WT
KH.C4.255		RIOK1; RIOK2; RIOK3	Mesenchyme, trunk endoderm	This Study, EST 34h19	Fig. S4E		protein serine/threonine kinase activity		0.0198012	2.41503	down	Xbp1DBD/WT
KH.C9.389	CDC7	CAMK1D; CDC7; TTBK1	Mesenchyme, head endoderm, endoderm, possibly sensory vesicle	Satou et al., 2001	N/A		protein kinase activity, ATP binding		0.00709204	2.35889	down	Xbp1::VP16/WT
KH.C14.538		SUZ12	Mesenchyme	This Study, EST 92H05	data not shown		negative regulator of transcription		0.0191046	2.33389	up	Xbp1DBD/WT
KH.S455.7		KH.S455.7	No signal	This Study, EST 64M07	N/A		C-type lectin-like/link domain superfamily		0.0214974	2.32705	up	Xbp1::VP16/WT
KH.C8.801		UQCRB	Unlocalized signal	This Study, 57m19	N/A		Part of the ubiquinol-cytochrome c oxidoreductase complex		0.0320524	2.28341	up	Xbp1::VP16/WT
KH.C1.1045		CPN2; LGR5; LRC15	Mesenchyme	This Study, EST 43n11	Fig. S4F		fibronectin binding	Foxa.a*	0.0177178	2.24439	down	Xbp1DBD/WT
KH.C12.302		MAMDC2; MAMDC4	Weak expression, somewhat ubiquitous, slightly stronger in mesenchyme	Christiaen et al., 2008	N/A		membrane component	Foxa.a*	0.0460204	2.22941	up	Xbp1::VP16/WT
KH.L106.16	Nodal	BMP10; GDF2; NODAL	Epidermis	Yoshida et al., 2008	N/A		growth factor	Foxa.a*	0.0152925	2.22572	up	Xbp1::VP16/WT
KH.C10.448		B4GALT1; B4GALT2; B4GALT3	Epidermis	Jose'-Edwards et al., 2013	N/A		carbohydrate metabolic process, transferase activity	Foxa.a*	0.041416	2.20422	down	Xbp1DBD/WT
KH.L168.2		DGKA; DGKB; DGKG	Epidermis, atrial siphon primordia, palps	Kusakabe et al., 2002	N/A	Atrial siphon primordia, possibly oral siphon primordium (Kusakabe et al., 2002)	calcium ion binding, intracellular signal transduction	Foxa.a*	0.033176	2.18502	up	Xbp1::VP16/WT
KH.C6.298		KH.C6.298	Mesenchyme	This Study, EST 34o09	data not shown		N/A		0.00150226	2.16167	up	Xbp1::VP16/WT
KH.L71.18		RAB11A; RAB11B; RAB4A	Ventral sensory vesicle	Shimozono et al., 2010	N/A		GTP binding	Foxa.a*	0.0422239	2.12759	up	Xbp1::VP16/WT
KH.L96.67		DAPK1; ERN1; ERN2	Very faint, seemingly ubiquitous signal	This Study, 38d08	N/A		Serine/threonine protein kinase and endoribonuclease		0.022014	2.12448	down	Xbp1DBD/WT
KH.L92.4		KH.L92.4	Unlocalized signal	This Study, EST 01f03	N/A	Not detected (Ogasawara et al., 2002)	oxidoreductase activity	Foxa.a*	0.00339224	2.09223	up	Xbp1::VP16/WT
KH.C2.705		DGLA; DGLB	Mesenchyme	This Study, EST 10E22	Fig. S4G		lipid metabolic process	Foxa.a*	0.0228933	2.05416	up	Xbp1DBD/WT
KH.S779.1		ACTA1; ACTC1; ACTG1	Mesenchyme	This Study, EST 56J17	Fig. S4H		actin		0.0293588	2.03581	up	Xbp1::VP16/WT
KH.S406.19		FGF10; FGF3; FGF7	Posterior sensory vesicle, nerve cord, visceral ganglion	Hudson et al., 2011	N/A		fibroblast growth factor family	Foxa.a*	0.00601718	2.02414	up	Xbp1::VP16/WT
Not analyzed:
KH.S437.10		KH.S437.10					cytokine	Foxa.a*	0.00076543	7.56897	up	Xbp1::VP16/WT
KH.C5.582		SLC13A1; SLC13A2; SLC13A5					solute carrier		0.0200461	4.7289	up	Xbp1::VP16/WT
KH.L153.1		CPT1A; CPT1B; CPT1C					Enzyme: carnitine O-palmitoyltransferase	Foxa.a*	0.00402641	3.29374	up	Xbp1::VP16/WT
KH.C3.735		GIN1; NYNRIN; RTL1					Enzyme: retrotransposase		0.00118804	3.0283	up	Xbp1::VP16/WT
KH.C12.402		KH.C12.402					N/A	Foxa.a*	0.013766	2.53176	up	Xbp1::VP16/WT
KH.L28.7		FER; RET; STYK1				Hemocytes (Ogasawara et al., 2006)	protein kinase activity		0.0215781	2.29701	up	Xbp1::VP16/WT
KH.C9.398		KH.C9.398					N/A		0.0267366	2.27875	up	Xbp1DBD/WT
KH.C1.1202		DOCK10; DOCK11; DOCK9					Rho guanyl-nucleotide exchange factor activity	Foxa.a*	0.0459535	2.12653	up	Xbp1::VP16/WT
KH.C4.570		GALNT12; GALNT4; POC1B-GALNT4					Enzyme: UDP-GalNAc:polypeptide N-acetylgalactosaminyltransferase	Foxa.a*	0.018829	2.10908	down	Xbp1DBD/WT
* Kubo et al., 2010
** Jose'-Edwards et al., 2013
N/A, not available/applicable
