# Supplementary material for: Xbp1 and Brachyury establish an evolutionarily conserved subcircuit of the notochord gene regulatory network
Source: eLife journal article supplement (doi:10.7554/elife.73992), 2022-01-20
Supplement: supp [file elife-73992-supp-v1.zip › elife_poa_e73992_Supplementary_file_3.xlsx]

## Sheet: Sheet1
Table S3. Expression of Xenopus orthologs of Ciona Xbp1 notochord target genes.
Ciona gene model	Ciona gene name	Expression in Ciona	Expression in Xenopus (Xenbase*)
KH.S1404.1	TBX19; TBX6; TBXT	Notochord	Notochord, posterior paraxial mesoderm
KH.C9.485	LHX5; LMX1A; LMX1B	Notochord	CNS, pronephros (LMX1B)
KH.C8.719	PTBP1; PTBP2; PTBP3	Transient notochord	Posterior notochord (PTBP3); Noiret et al., 2012
KH.C2.33	ZNF385A; ZNF385B; ZNF385D	Notochord	Somites, eye, pharyngeal arches (ZNF385A)
KH.L17.15	NR2F1; NR2F2; NR2F6	Ubiquitous	CNS, blood vessels, pharyngeal arches (NR2F2)
KH.S1497.1	NYNRIN; RTL1	Transient notochord and mesenchyme	N/A
KH.L154.7	H1F0; H1FX; HIST1H1C	Weak and transient notochord, mesenchyme	N/A
KH.C11.596	SLC13A2; SLC13A3; SLC13A5	Notochord and trunk endoderm	Epidermis (SLC13A2 and SLC13A3); Blood islands, CNS, pronephros (SLC13A5)
KH.L37.39	SLC18A2; SLC18A3; SLC18B1	Notochord, head endoderm, mesenchyme	Epidermis, pharyngeal arches, eye (SLC18A2); Nervous system (SLC18A3)
KH.C12.115	SLC23A1; SLC23A2; SLC23A3	Notochord	N/A
KH.C7.65	SLC26A2; SLC26A4; SLC26A5	Notochord	Epidermis (SLC26A4)
KH.C8.466	SLC43A1; SLC43A2; SLC43A3	Notochord	CNS, somites, pharyngeal arches (SLC43A1); CNS, pronephros, heart (SLC43A2)
KH.C8.582	KCNMB3	Notochord, head endoderm	N/A
KH.C6.141	C1QTNF9B	Notochord, mesenchyme, trunk endoderm, endodermal strand	N/A
KH.C7.484	HMCN1; HMCN2; TTN	Notochord and trunk endoderm	N/A
KH.C3.21	HMCN1; HSPG2; LAMA2	Notochord	N/A
KH.C1.1220	COL12A1; COL20A1; SELP	Notochord	Somites (COL12A1)
KH.C3.225	FBN1; FBN2; FBN3	Notochord, epidermis	Notochord, somites, floor plate (FBN3); Heart (FBN1)
KH.C2.1123	ADAMTS3; SEMA5A; UNC5C	Notochord	Notochord, CNS, pronephros, somites (SEMA5B)
KH.C1.832	FGL1; FGL2; FIBCD1	Notochord	N/A
KH.C10.317	FN1	Notochord	CNS, dorsal lateral plate mesoderm, dorsal gut endoderm
KH.C2.872	GNAI1; GNAI2; GNAI3	Notochord and bipolar tail neurons	CNS, pronephros, pharyngeal region (GNAI1)
KH.L1.1	TRAF2; TRAF3; TRAF5	Transient notochord at early tailbud	N/A
KH.C8.378	RXFP1; RXFP2; TSHR	Notochord, mesenchyme and trunk endoderm	N/A
KH.L131.17	CUZD1; TECTA; UMOD	Notochord, mesenchyme, epidermis	N/A
KH.C11.674	CUZD1; OIT3; ZP2	Semi-ubiquitous staining, stronger in notochord	N/A
KH.C3.724	TGFB1; TGFB2; TGFB3	Notochord	Notochord, somites, chordoneural hinge, cement gland (TGFB1); Notochord, somites, eye, cardiac mesoderm (TGFB2)
KH.C7.500	OLFM2; OLFML2A; OLFML2B	Notochord	CNS
KH.L18.30	PID1	Notochord	N/A
KH.C3.411	BMP4; LEFTY1; LEFTY2	Notochord precursors (transient), tail epidermis, posterior secondary muscle lineage	Notochord, CNS, endoderm, cardiac and lateral mesoderm (LEFTY); Retina, epidermis, cardiac mesoderm (BMP4)
KH.L99.8	LGI2; LGI3; TSPEAR	Notochord	N/A
KH.C11.665	CALML3; CETN2; CETN3	Notochord	N/A
KH.C9.753	PPIA; PPIB; PPIC	Weak staining in the notochord; stronger staining in posterior notochord, trunk endoderm and mesenchyme	CNS, pharyngeal arches, somites, pronephros (PPIA)
KH.C12.7	CASP3; CASP6; CASP7	Notochord, endoderm	N/A
KH.C5.16	A2M; CD109; PZP	Notochord	N/A
KH.S2308.1	F11; LPA; PLG	Semi-ubiquitous, stronger in trunk	N/A
KH.S663.4	TEX264	Notochord, trunk endoderm	N/A
KH.L87.39	BAX; BCL2; BOK	Weak notochord at early and mid-tailbud; distinct staining in sensory vesicle and diffuse staining in the tail	N/A
KH.S534.2	RB1CC1	Notochord, head endoderm, nervous system, epidermis	N/A
KH.C8.791	DTX3L; PCGF2; RNF220	Notochord (transient), weak epidermis, and a very small region of the posterior sensory vesicle	CNS (RNF220)
KH.C7.664	MIB1; MIB2	Diffuse semi-ubiquitous staining, stronger in notochord and trunk endoderm.	CNS and lens
KH.C6.205	LONRF2; PEX10; RNF13	Ubiquitous, stronger in the CNS and mesenchyme of tailbuds	N/A
KH.S681.3	CDCP2; CUBN; TLL2	Transient notochord, mesenchyme, sensory vesicle	CNS (TLL2)
KH.S461.5	GJA10; GJA8; GJC1	Notochord	CNS (GJC1)
KH.L146.6	DNAJC7; TOMM34; TTC1	Diffuse semi-ubiquitous staining, stronger in mesenchyme but also visible in notochord.	N/A
KH.C14.39	VPS35L	Diffuse staining, stronger in notochord and trunk	N/A
KH.L99.2	CLVS1; RLBP1; TTPAL	Notochord, only early stages	N/A
KH.C2.58	NEK1; NEK3; NEK5	Whole body, stronger in Notochord and endoderm	Pronephros (NEK5)
KH.C2.792	CHST1; CHST3; CHST4	Notochord	N/A
KH.C13.68	AKR1B10; AKR1B15; GCLM	Transient notochord, mesenchyme, epidermis in larvae	N/A (GCLM)
KH.C12.74	EPX; MPO; PXDN	Diffuse semi-ubiquitous staining, including notochord	Blood islands (MPO); CNS and pronephros (PXDN)
KH.S749.1	GFAP; INA; VIM	Notochord, mesenchyme, trunk endoderm in late tailbuds	CNS (INA and VIM)
*Xenbase.org -Bowes et al., 2010
N/A, not available
