# Supplementary figures and images for: Xbp1 and Brachyury establish an evolutionarily conserved subcircuit of the notochord gene regulatory network
Source: eLife journal article supplement (doi:10.7554/elife.73992), 2022-01-20

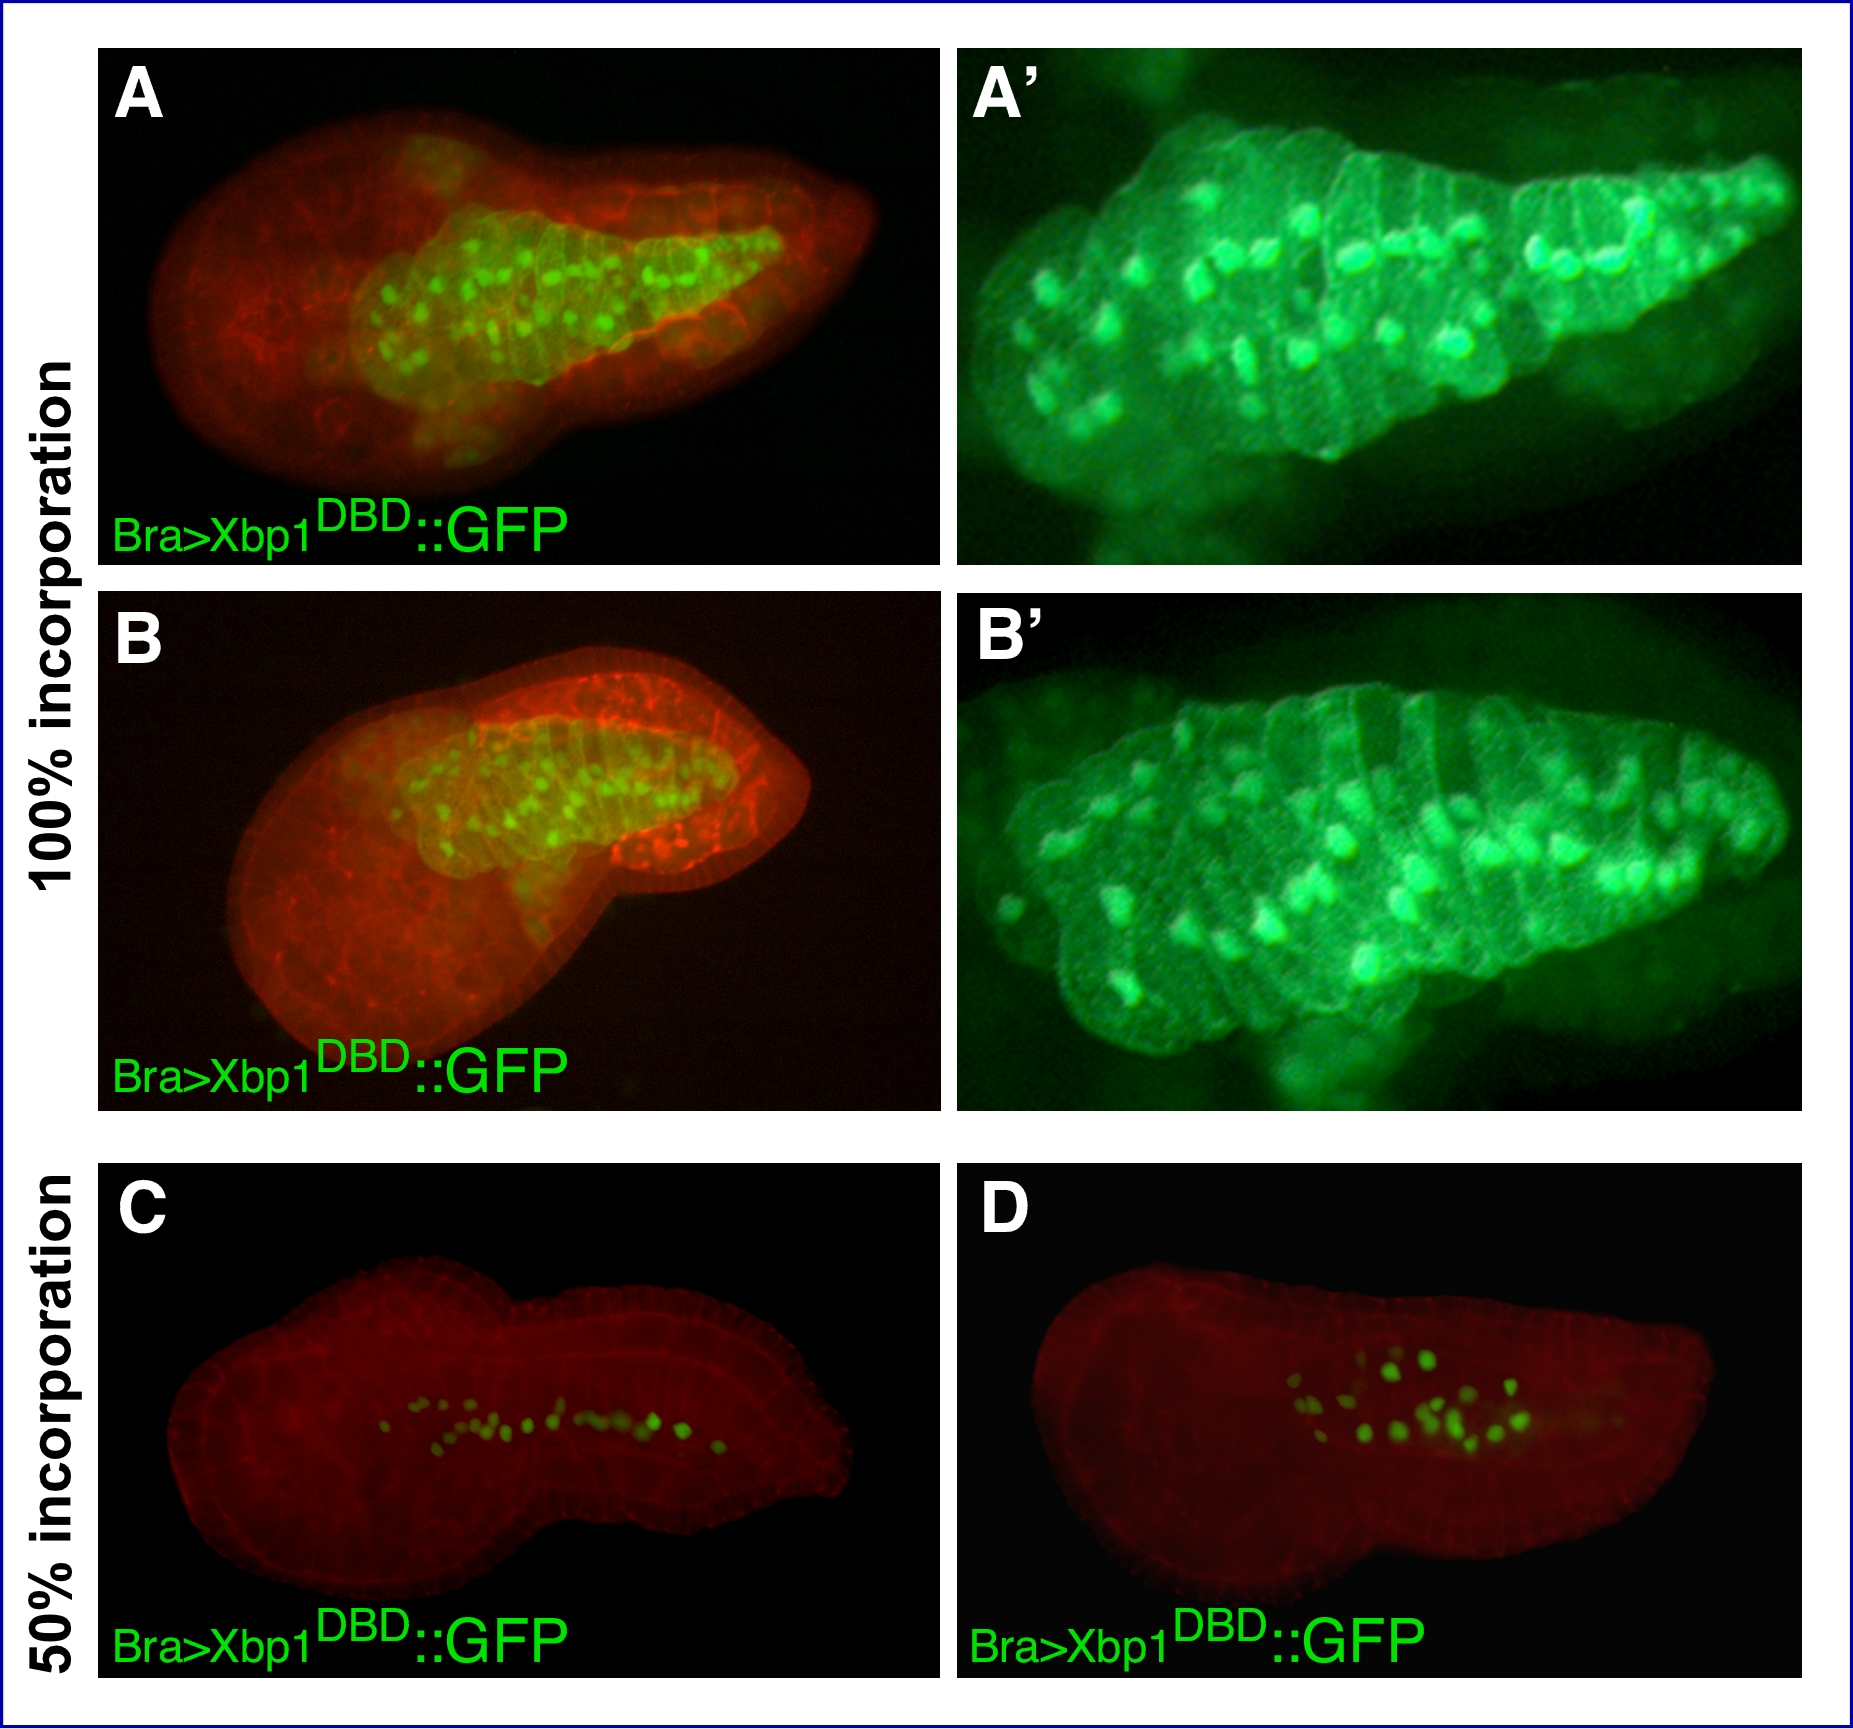

Supplement: supp [file elife-73992-supp-v1.zip › elife_poa_e73992_Figure_2_figure_supplement_1.jpg]

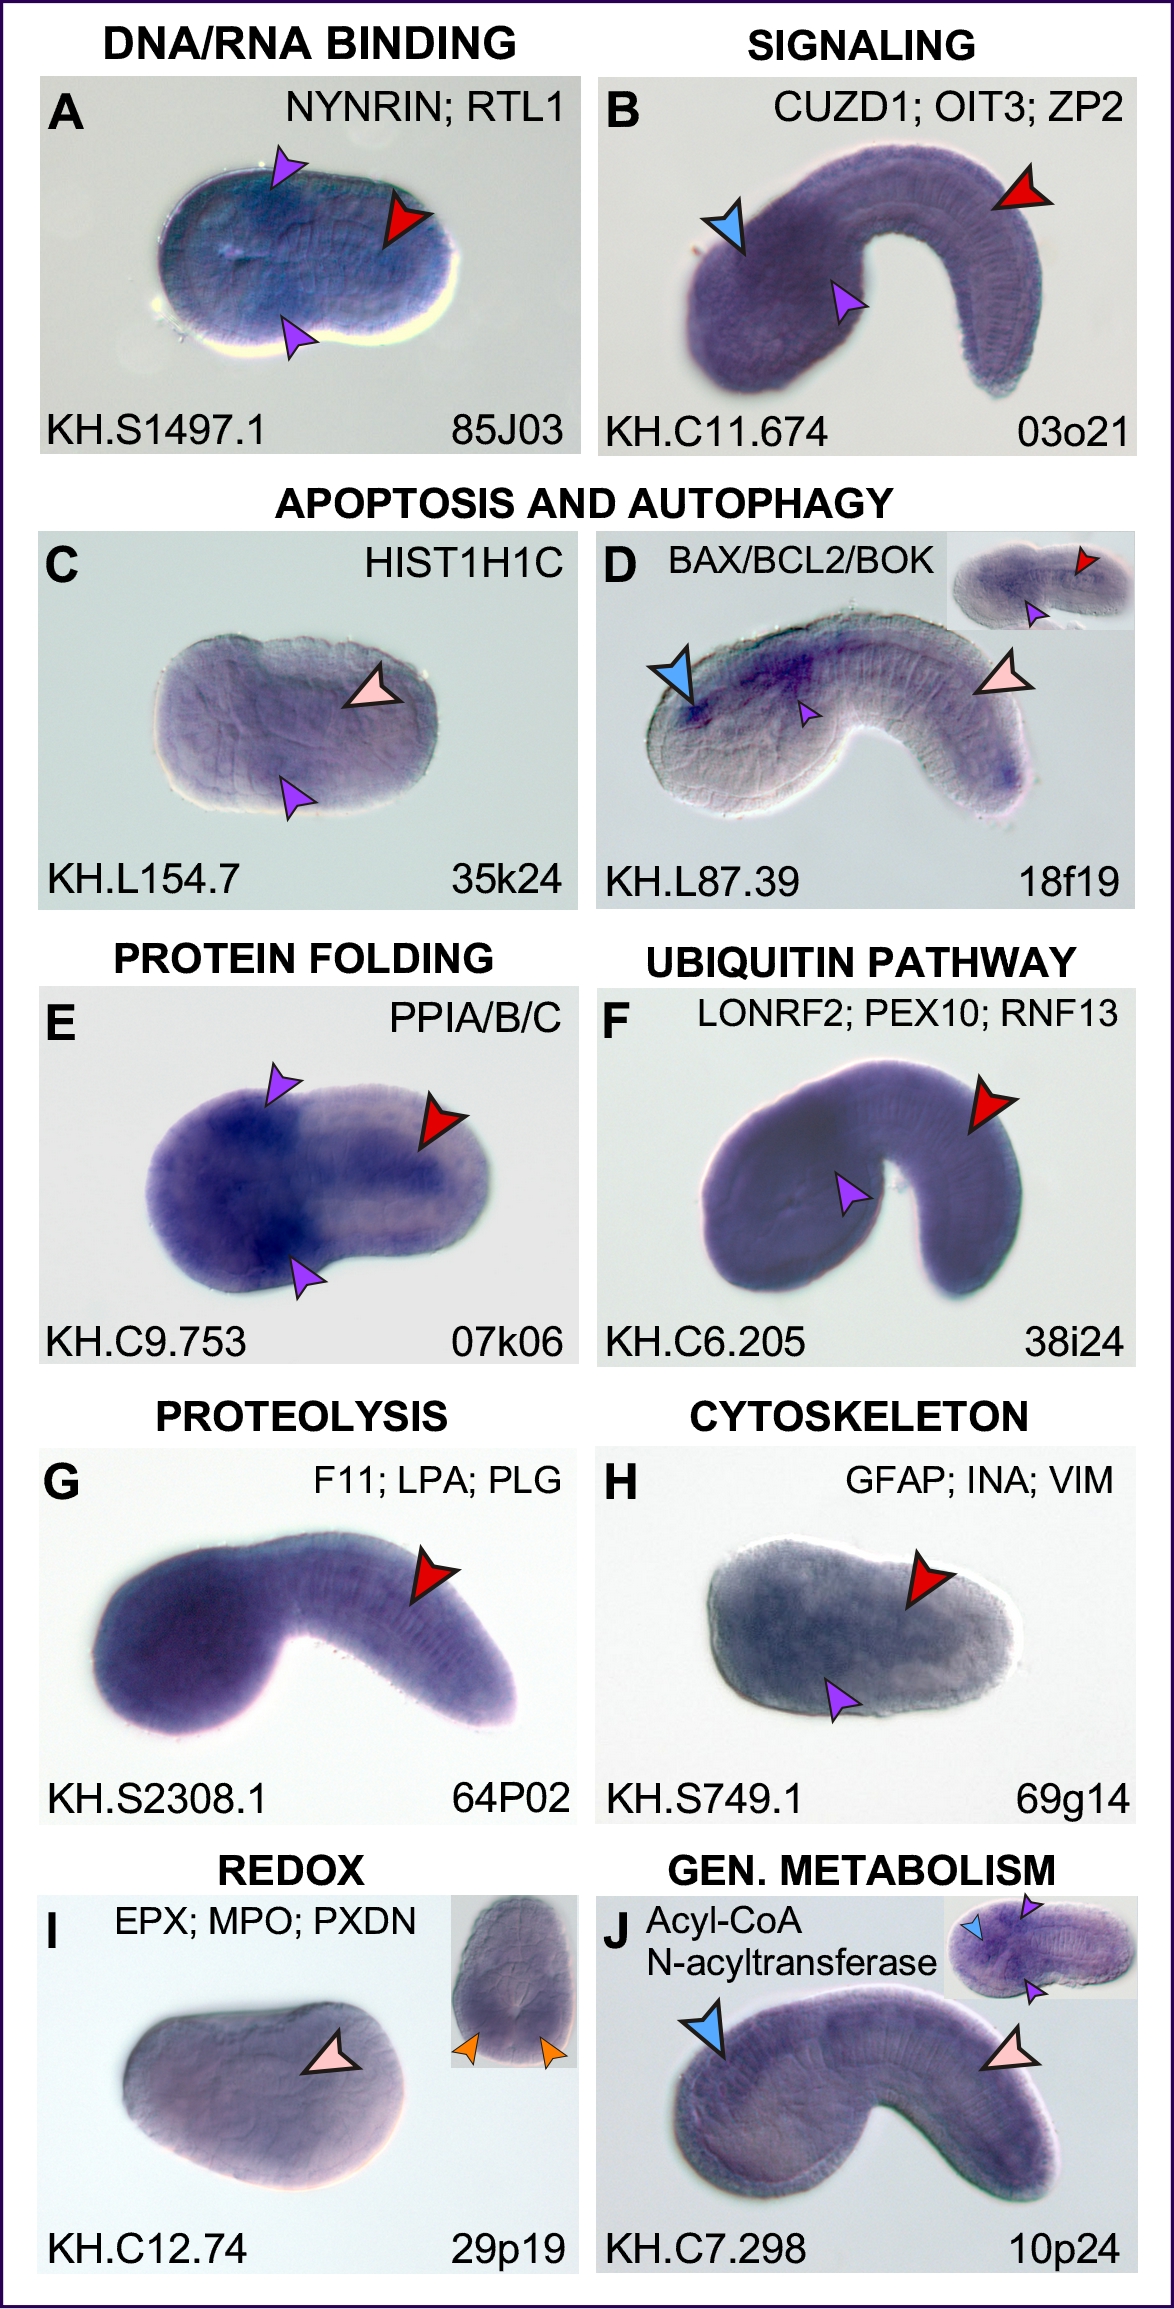

Supplement: supp [file elife-73992-supp-v1.zip › elife_poa_e73992_Figure_3_figure_supplement_1.jpg]

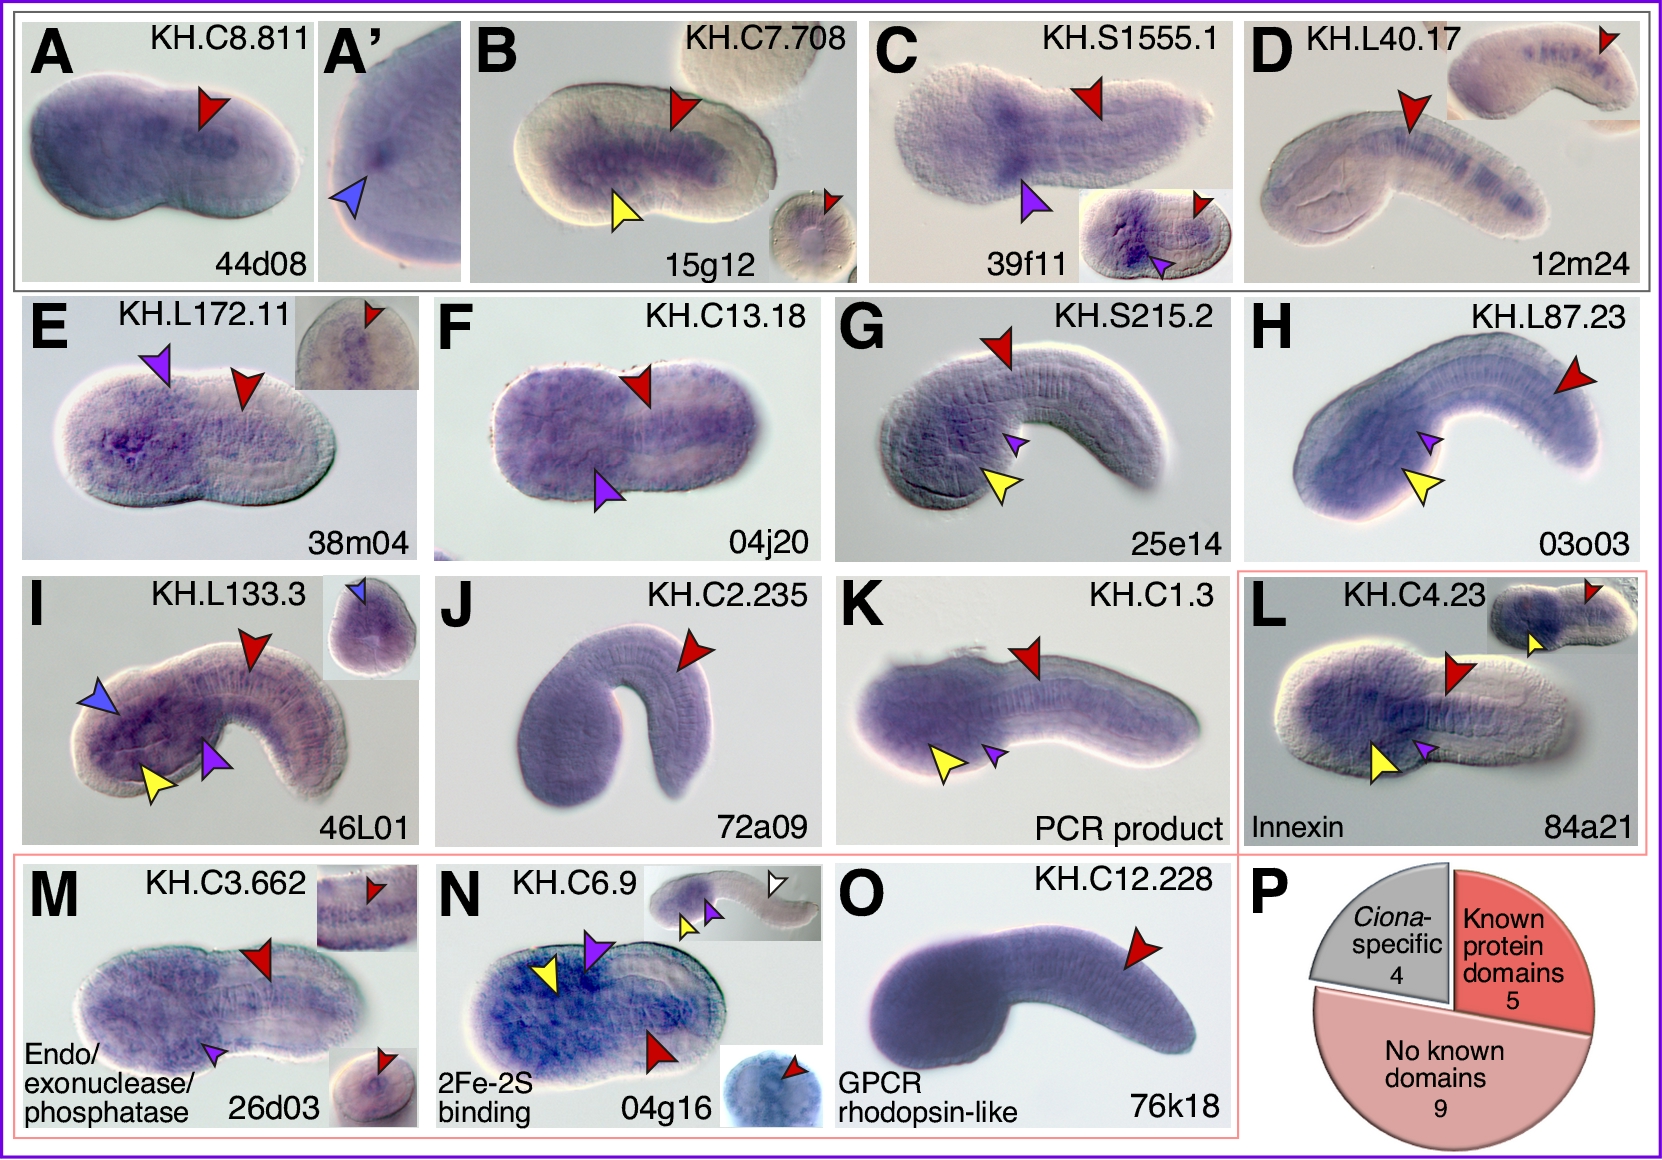

Supplement: supp [file elife-73992-supp-v1.zip › elife_poa_e73992_Figure_3_figure_supplement_2.jpg]

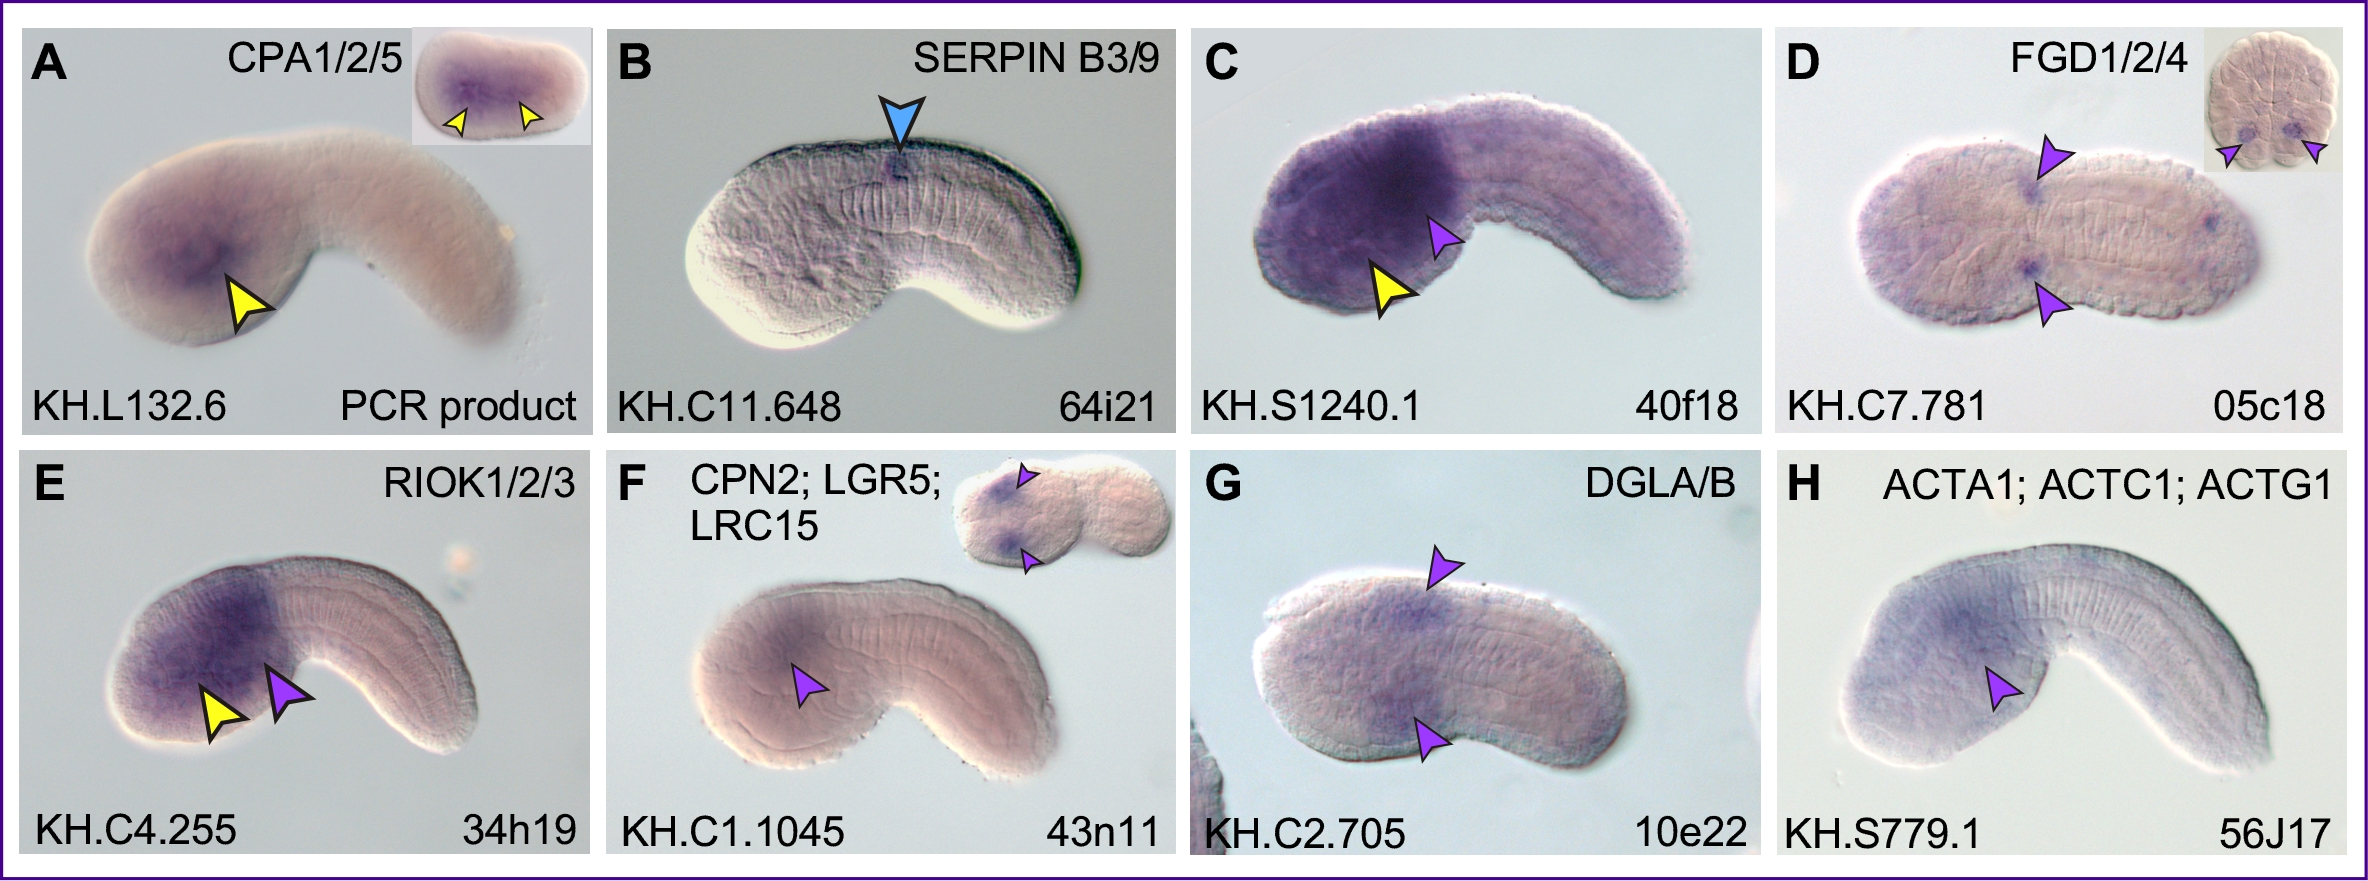

Supplement: supp [file elife-73992-supp-v1.zip › elife_poa_e73992_Figure_3_figure_supplement_3.jpg]

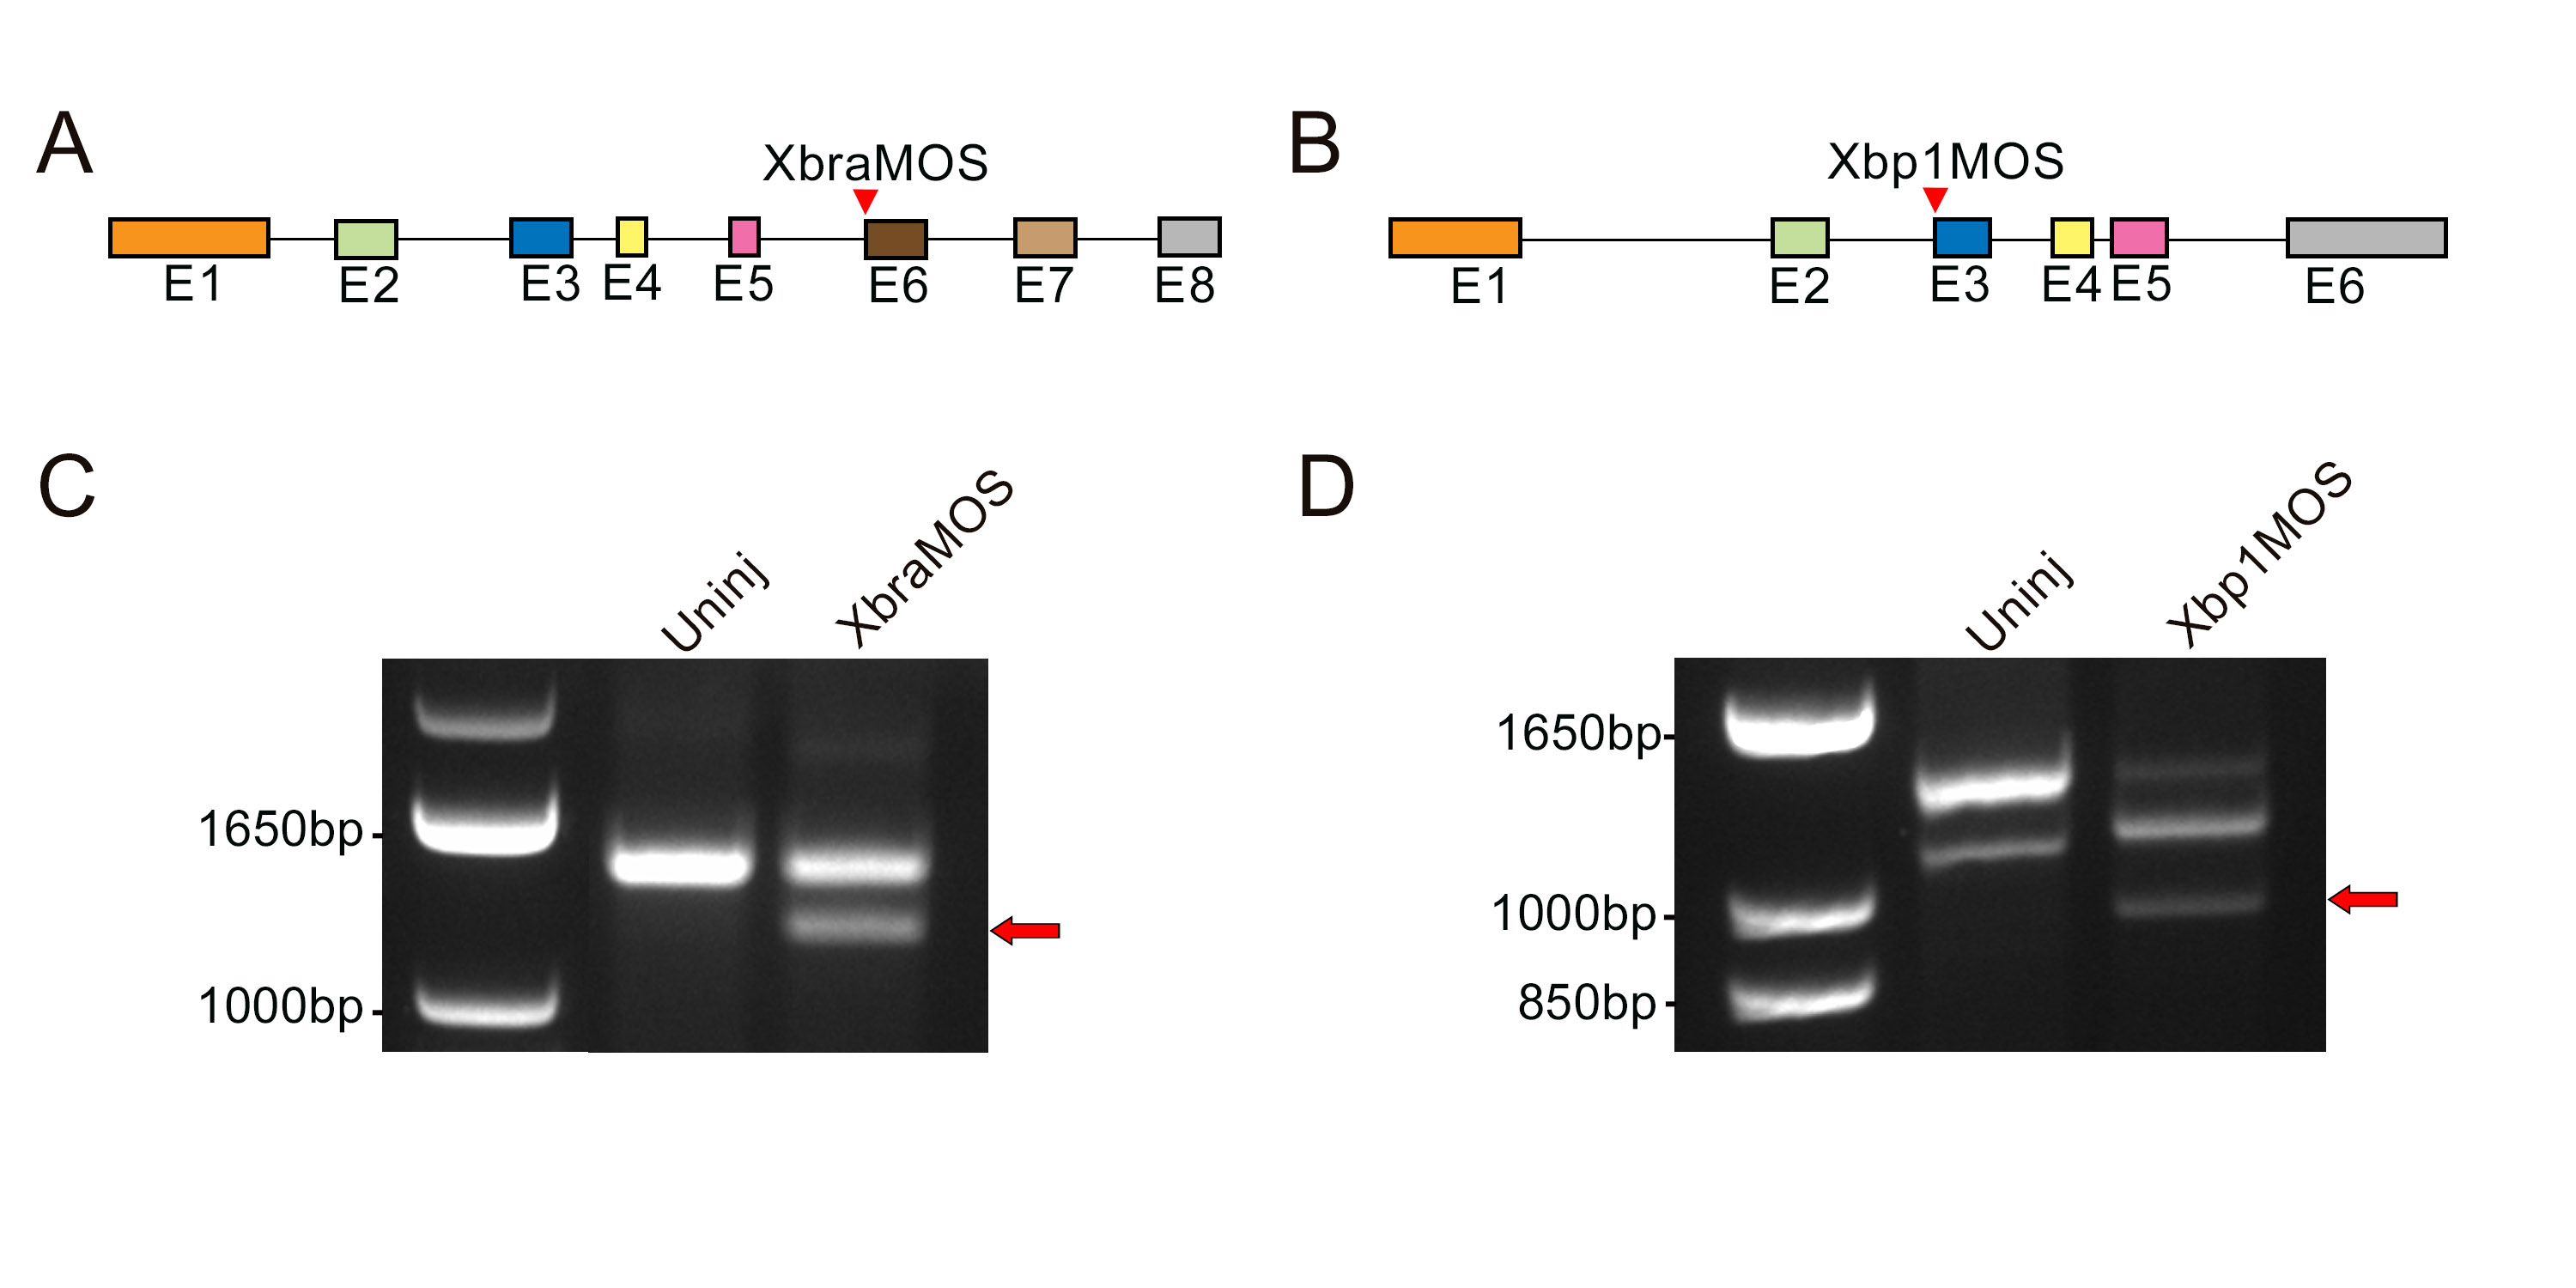

Supplement: supp [file elife-73992-supp-v1.zip › elife_poa_e73992_Figure_5_figure_supplement_1.jpg]

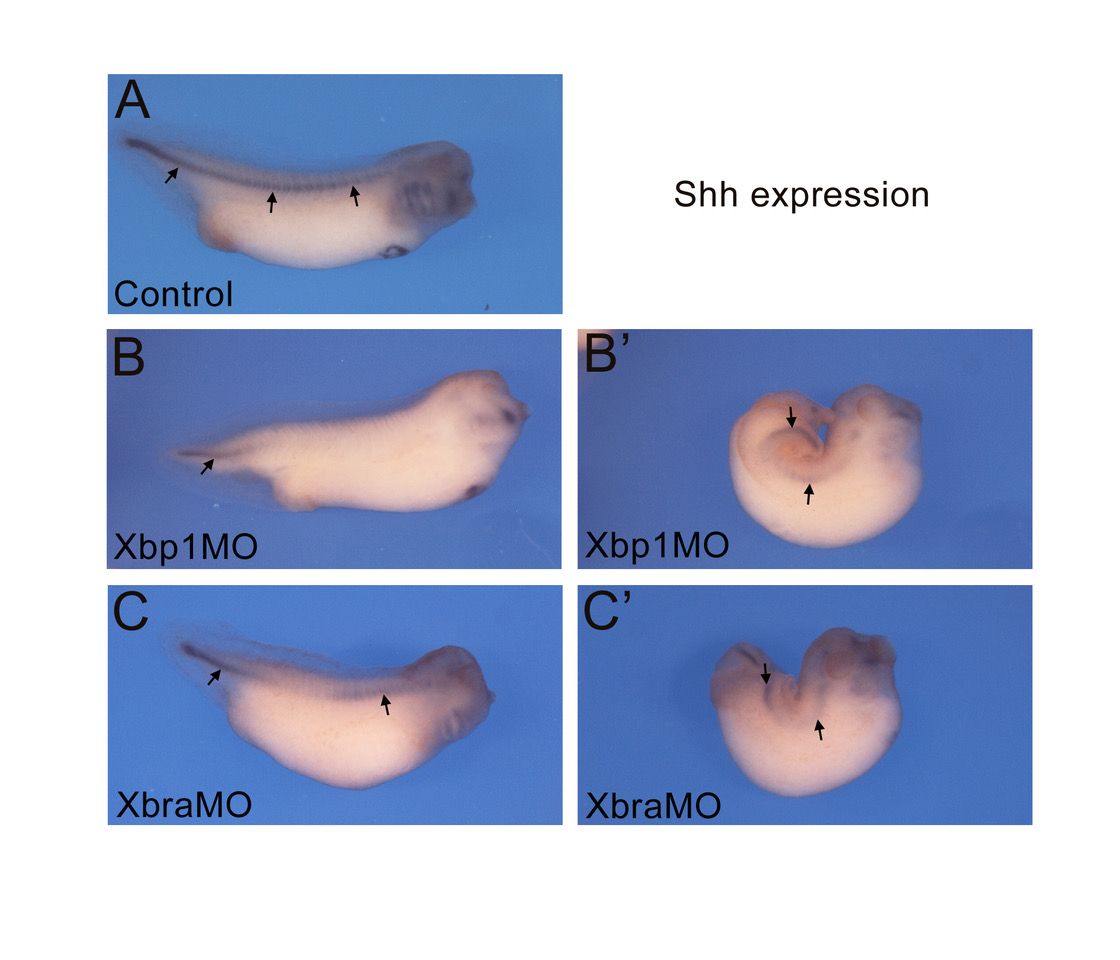

Supplement: supp [file elife-73992-supp-v1.zip › elife_poa_e73992_Figure_6_figure_supplement_1.jpg]

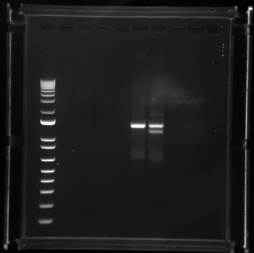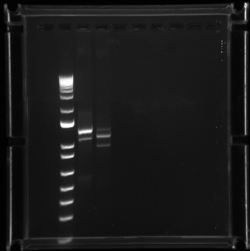

Supplement: supp [file elife-73992-supp-v1.zip › elife_poa_e73992_Figure_5_figure_supplement_1_source_data_1.pdf]

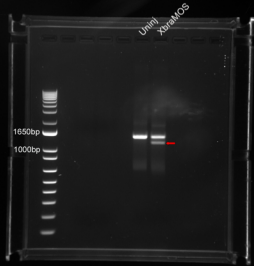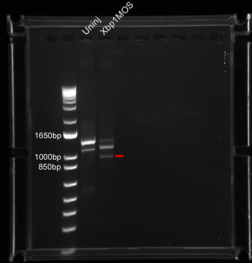

Supplement: supp [file elife-73992-supp-v1.zip › elife_poa_e73992_Figure_5_figure_supplement_1_source_data_2.pdf]
